1 **Targeted surveillance strategies for efficient detection of novel antibiotic**  
2 **resistance variants**

3

4 Allison L. Hicks<sup>1</sup>, Stephen M. Kissler<sup>1</sup>, Tatum D. Mortimer<sup>1</sup>, Kevin C. Ma<sup>1</sup>, George  
5 Taiaroa<sup>2</sup>, Melinda Ashcroft<sup>2</sup>, Deborah A. Williamson<sup>2</sup>, Marc Lipsitch<sup>1,3</sup>, Yonatan H.  
6 Grad<sup>1,4,\*</sup>

7

8 1 Department of Immunology and Infectious Diseases, Harvard T. H. Chan School of  
9 Public Health, Boston, Massachusetts, United States of America

10 2 Department of Microbiology and Immunology, The University of Melbourne at The  
11 Peter Doherty Institute for Infection and Immunity, Melbourne, Australia

12 3 Center for Communicable Disease Dynamics, Department of Epidemiology, Harvard T.  
13 H. Chan School of Public Health, Boston, Massachusetts, United States of America,

14 4 Division of Infectious Diseases, Department of Medicine, Brigham and Women's  
15 Hospital, Harvard Medical School, Boston, Massachusetts, United States of America

16

17

18 \* Corresponding author: [ygrad@hsph.harvard.edu](mailto:ygrad@hsph.harvard.edu)

19

20 **Abstract:**

21 Genotype-based diagnostics for antibiotic resistance represent a promising alternative to  
22 empiric therapy, reducing inappropriate and ineffective antibiotic use. However, because  
23 such assays infer resistance phenotypes based on the presence or absence of known  
24 genetic markers, their utility will wane in response to the emergence of novel resistance.  
25 Maintenance of these diagnostics will therefore require surveillance designed to ensure  
26 early detection of novel resistance variants, but efficient strategies to do so remain to be  
27 defined. Here, we evaluate the efficiency of targeted sampling approaches informed by  
28 patient and pathogen characteristics in detecting genetic variants associated with  
29 antibiotic resistance or diagnostic escape in *Neisseria gonorrhoeae*, focusing on this  
30 pathogen because of its high burden of disease, the imminent threat of treatment  
31 resistance, and the use and ongoing development of genotype-based diagnostics. We  
32 show that incorporating patient characteristics, such as demographics, geographic  
33 regions, or anatomical sites of isolate collection, into sampling approaches is not a reliable  
34 strategy for increasing variant detection efficiency. In contrast, sampling approaches  
35 informed by pathogen characteristics, such as genomic diversity and genomic  
36 background, are significantly more efficient than random sampling in identifying genetic  
37 variants associated with antibiotic resistance and diagnostic escape.

38

39 **Introduction:**

40 Nucleic acid-based diagnostics that enable rapid pathogen identification and  
41 prediction of drug susceptibility profiles can improve clinical decision-making, reduce  
42 inappropriate antibiotic use, and help address the challenge of antibiotic resistance<sup>1-3</sup>.  
43 However, the sensitivity of such diagnostics may be undermined by undetected genetic  
44 variants<sup>4-12</sup>. Pathogen surveillance programs aimed at early detection of novel variants  
45 are crucial to ensuring the clinical utility and sustainability of these diagnostics.

46 Use of traditional nucleic acid amplification tests (NAATs) for pathogen  
47 identification and genotype-based diagnostics for antibiotic resistance can select for  
48 genetic variants that escape detection<sup>13</sup>. Mutations and/or deletions at the NAAT target  
49 locus that cause an amplification failure have arisen in *Neisseria gonorrhoeae*, *Chlamydia*  
50 *trachomatis*, *Staphylococcus aureus*, and *Plasmodium falciparum*, resulting in false  
51 negative diagnostic errors only detected when using another diagnostic platform<sup>5-7,11</sup>.  
52 Diagnostic escape associated with genotype-based diagnostics for antibiotic resistance  
53 are the result of resistance-conferring variants (e.g., mutations or accessory genes) not  
54 accounted for in the diagnostic's panel of resistance markers<sup>4</sup> and require phenotypic  
55 testing to be uncovered.

56 We recently presented a framework to quantify the sampling rate for early  
57 detection of novel antibiotic resistance variants, defining the number of isolates that would  
58 need to undergo confirmatory phenotyping from those predicted by genotype to be  
59 susceptible<sup>14</sup>. Underlying this model are assumptions of unbiased sampling across a  
60 population and independence among all isolates. However, these assumptions may not  
61 hold in practice, as some subsets of the population (e.g., demographics and/or

62 geographic regions) may be more likely to be sampled than others, and clonal  
63 transmission may result in repeated sampling of closely related isolates<sup>15-18</sup>. The real-  
64 world application of this model may also be challenging for pathogens with high case  
65 incidence, such as *N. gonorrhoeae*, as the cost of phenotyping required by this model for  
66 timely detection of novel resistance variants is likely to be high<sup>14</sup>.

67 Implementing a practical surveillance system thus requires improving efficiency  
68 over unbiased testing by prioritizing samples in which novel diagnostic escape variants  
69 are most likely to be found. There are numerous hypotheses for how to focus sampling  
70 and most quickly identify these variants. Novel variants may be more likely to emerge or  
71 spread in certain anatomical niches, demographics, or geographic regions<sup>19-22</sup>, some of  
72 which may be systematically under-sampled<sup>23</sup> and thus may provide a basis for sampling  
73 priority. Data on such characteristics may be obtained from metadata recorded during  
74 clinical encounters. Alternatively, they may be inferred from pathogen genomic data.  
75 Isolates or clades that are genetically divergent from the majority of isolates in a  
76 population may reflect travelers, their contacts, or otherwise under-sampled lineages<sup>24-</sup>  
77 <sup>27</sup>. Some pathogen genomic backgrounds may be more conducive to the evolution of  
78 novel resistance mechanisms<sup>28</sup>, and markers of these genomic backgrounds (*e.g.*,  
79 variants associated with a range of resistance mechanisms and/or resistance to other  
80 drugs) may help improve sampling efficiency. Similarly, given historical patterns of  
81 antibiotic use, novel resistance may emerge on a background of existing resistance<sup>29</sup>.  
82 Thus, genetic markers of resistance to certain drugs may facilitate identification of  
83 lineages more likely to have experienced selective pressures leading to emergence of  
84 novel resistance variants.

85           Here, we test the performance of sampling strategies informed by these  
86 hypotheses using *N. gonorrhoeae* surveillance data. *N. gonorrhoeae* offers a useful  
87 model, given the increasing drug resistance and recent focus on developing sequence-  
88 based resistance diagnostics<sup>2,30</sup>. We present targeted sampling approaches informed by  
89 patient (*i.e.*, demographics, anatomical site of isolate collection, geographical region,  
90 recent travel history, or sex worker status) and pathogen (*i.e.*, phylogenetic or genomic  
91 background) information. We assess the efficiency of each of these strategies to detect  
92 rare (<10% prevalence) resistance variants associated with current or recent first-line  
93 recommended antibiotics (*i.e.*, azithromycin [AZM] and extended spectrum  
94 cephalosporins [ESCs]), as well as rare genetic variants associated with diagnostic  
95 escape, across five genomic surveys with various demographic, geographic, and  
96 temporal ranges. We show that phylogeny- and genomic background-aware sampling  
97 approaches can increase the detection efficiency of known variants over random  
98 sampling, whereas patient feature-based sampling approaches do not. Our results  
99 suggest that implementation of such targeted sampling approaches into surveillance  
100 programs may reduce the number of cases of novel resistance that occur before it is  
101 detected, as well as the resources required to undertake surveillance, compared to  
102 random sampling of a population.

103

## 104 **Results:**

### 105 **Composition of the datasets.**

106 The datasets (**Table 1**) were biased across patient demographics and/or geographic  
107 regions (**Tables S1** and **S2**). Isolates from men and men who have sex with men (MSM)

108 were overrepresented in datasets 1 and 2 compared to overall gonorrhoea incidence in  
109 men and MSM in the US and Australia, respectively, during the study periods (**Table S2**,  
110  $P < 0.001$  for both datasets by chi-squared test of men vs. women and MSM vs. non-  
111 MSM in dataset vs. reported incidence). Dataset 4 was comprised exclusively of isolates  
112 from men <sup>31</sup>. While it is difficult to estimate the prevalence of pharyngeal gonococcal  
113 infections, as they tend to be asymptomatic <sup>32</sup>, pharyngeal isolates represented 4% and  
114 18% of isolates with reported anatomical site of collection in datasets 1 and 2,  
115 respectively. This suggests either sampling bias across anatomical sites in at least one  
116 of the datasets or substantial variation across the two study populations in prevalence of  
117 pharyngeal gonococcal infections. Similarly, the geographic distribution of isolates in  
118 dataset 3 was significantly different from the reported case incidence across countries  
119 (**Table S2**,  $P < 0.001$  by chi-squared test of prevalence for each of the countries in dataset  
120 3 vs. the reported overall incidence for each of the countries).

121

122 **Table 1.** Summary of datasets.

| Dataset | Temporal range | N <sub>isolates</sub> | Geographic range    | Metadata available                                                                       | SRA study ID/Reference                                    |
|---------|----------------|-----------------------|---------------------|------------------------------------------------------------------------------------------|-----------------------------------------------------------|
| 1       | 2011-2015      | 896                   | New York, NY, US    | Gender, sexual behavior, anatomical site of isolation                                    | ERP011192 [Mortimer et al., 2020, <i>in preparation</i> ] |
| 2       | 2016-2017      | 2186                  | Victoria, Australia | Gender, sexual behavior, anatomical site of isolation, travel history, sex worker status | SRP185594 <sup>33</sup>                                   |
| 3       | 2013           | 1054                  | Europe              | Country of sample collection                                                             | ERP010312 <sup>34</sup>                                   |
| 4       | 2015           | 244                   | Japan               | Prefecture of sample collection                                                          | DRP004052 <sup>31</sup>                                   |
| 5       | 2014-2015      | 398                   | New Zealand         | N/A                                                                                      | SRP111927 <sup>35</sup>                                   |

123

124 **Targeted sampling based on patient characteristics.**

125 We investigated whether sampling evenly across demographic groups (demography-  
 126 aware sampling), anatomical sites of isolate collection (niche-aware sampling), and  
 127 geographic regions (geography-aware sampling) increased detection efficiency of  
 128 resistance variants by ameliorating some of the demographic, niche, or geographic  
 129 sampling biases. We further investigated whether preferentially sampling patients with  
 130 recent overseas sexual encounters or recent sex work, two characteristics hypothesized  
 131 to be associated with the introduction and/or increased transmission of resistance<sup>19,21,22</sup>,  
 132 increased the detection efficiency of resistance variants. To do so, we simulated and  
 133 compared the detection efficiency of three genetic resistance variants (**Table 2**) using  
 134 each of these targeted sampling strategies and random sampling.

135

136 **Table 2.** Summary by dataset of the prevalence and distribution of the genetic markers  
 137 of resistance and resistance phenotypes tested.

| Variant                                                            | Genetic           |                                     |                    | Phenotypic              |                        |       |
|--------------------------------------------------------------------|-------------------|-------------------------------------|--------------------|-------------------------|------------------------|-------|
|                                                                    | RplD G70D         | 23S rRNA<br>C2611T (2-4<br>alleles) | <i>penA</i> XXXIV  | CRO-RS<br>(≥0.12 µg/mL) | CFX-R (>0.25<br>µg/mL) |       |
| <b>Drug</b>                                                        | AZM <sup>36</sup> | AZM <sup>37</sup>                   | ESCs <sup>38</sup> | N/A                     | N/A                    |       |
| <b>Prevalence<br/>of variant in<br/>dataset</b>                    | <b>1</b>          | 10.04% <sup>a</sup>                 | 0.11%              | 5.25%                   | 1.47%                  | 0.11% |
|                                                                    | <b>2</b>          | 1.14%                               | 1.24%              | 1.69%                   | 0%                     | 0%    |
|                                                                    | <b>3</b>          | 2.47%                               | 0.95%              | 15.68% <sup>a</sup>     | 1.04%                  | 0.76% |
|                                                                    | <b>4</b>          | 11.07% <sup>a</sup>                 | 1.23%              | 0.41%                   | 6.56%                  | 8.20% |
|                                                                    | <b>5</b>          | 0.75%                               | 0.50%              | 2.26%                   | 0.25%                  | 0%    |
| <b>Phylogenetic<br/>D statistic<br/>for variant in<br/>dataset</b> | <b>1</b>          | -0.18                               | 17.50              | -0.29                   | N/A                    | N/A   |
|                                                                    | <b>2</b>          | -0.10                               | 0.46               | -0.24                   | N/A                    | N/A   |
|                                                                    | <b>3</b>          | 0.05                                | 0.30               | -0.20                   | N/A                    | N/A   |
|                                                                    | <b>4</b>          | -0.16                               | 1.83               | 1.81                    | N/A                    | N/A   |
|                                                                    | <b>5</b>          | 0.83                                | 1.12               | -0.15                   | N/A                    | N/A   |

138 <sup>a</sup>Given the >10% prevalence of RplD G70D in datasets 1 and 4 and *penA* XXXIV in  
 139 dataset 3, these variants were excluded from sampling simulations.

140 AZM, azithromycin; ESC, extended-spectrum cephalosporin; CRO-RS, ceftriaxone  
 141 reduced susceptibility; CFX-R, cefixime resistance

142

143 The detection efficiency was not improved by demography-, niche-, geography-  
 144 aware sampling compared to random sampling for any of the resistance variants (**Table**

145 **S3, Fig. 1).** In several cases, detection efficiency significantly decreased in demography-  
146 or geography-aware sampling compared to random sampling, reflecting enrichment of  
147 the resistance variant in the overrepresented demographic or geographic region.  
148 However, no significant association between a given resistance variant and demographic  
149 group was observed across both dataset 1 and dataset 2, and no demographics or  
150 geographic regions were significantly enriched for all variants (**Table S1**), suggesting that  
151 preferential sampling of any of these demographics or geographic regions would not be  
152 a reliable strategy for increasing novel variant detection efficiency. For example, while  
153 *penA* XXXIV was significantly enriched in MSM compared to men who have sex with  
154 women and women who have sex with men (MSW/WSM) patients in dataset 2 ( $P < 0.003$ ,  
155 Fisher's exact test), there was no significant difference in the proportions of MSM and  
156 MSW/WSM with *penA* XXXIV in dataset 1 ( $P = 0.461$ , Fisher's exact test). Similarly, while  
157 the AZM-R-associated RplD G70D mutation in dataset 3 was at highest prevalence in  
158 patients from Malta and Greece (10% and 6.25%, respectively) and absent from patients  
159 from Denmark, the AZM-R-associated 23S C2611T variant was at highest prevalence in  
160 patients from Denmark (5.45%) and absent from patients from Malta or Greece.



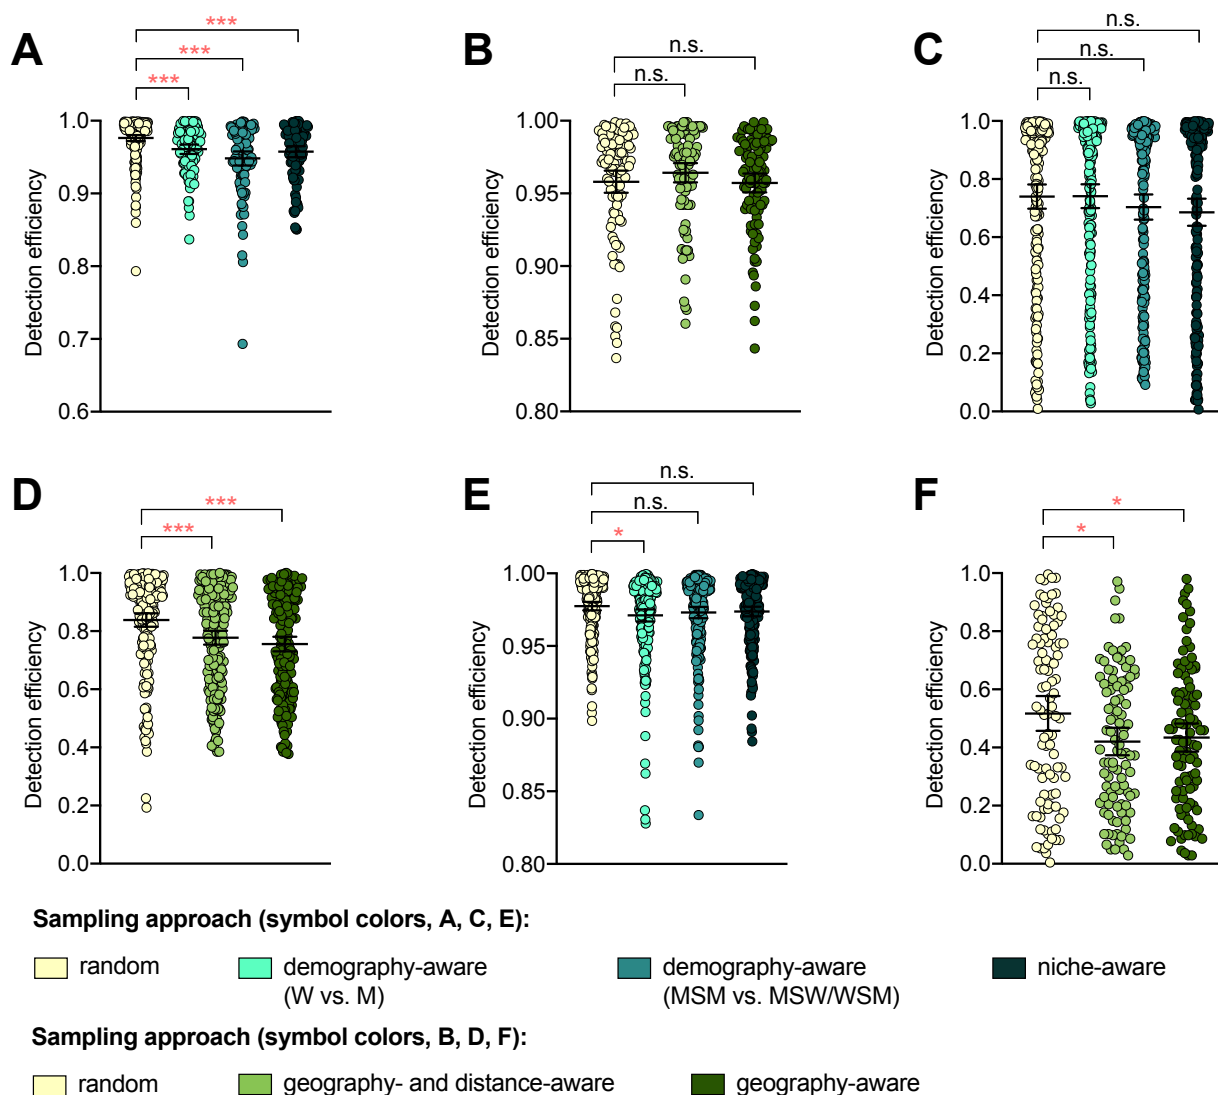

161  
 162 **Figure 1. The impact of demography-, niche-, and geography-aware sampling on**  
 163 **the detection efficiency of genetic resistance variants.** Dot plots showing the  
 164 detection efficiency (with lines indicating the mean and 95% confidence intervals from  
 165 100 simulations) for resistance variants RplD G70D (**A-B**), 23S rRNA C2611T (**C-D**), and  
 166 *penA* XXXIV (**E-F**) in datasets 1 and 2. In datasets 1 and 2, targeted sampling was  
 167 informed by demographic (gender and sexual behavior) and anatomical site of isolate  
 168 collection (niche) information (**A, C, and E**), and in datasets 3 and 4, targeted sampling  
 169 was informed by country or prefecture of sample collection (**B, D, and F**). Dot colors  
 170 indicate the sampling approach, and asterisks indicate a significant difference ( $P < 0.05$   
 171 by Mann-Whitney U test) in detection efficiency between the demography-, niche- or  
 172 geography-aware approach compared to random sampling (\* $P < 0.05$ , \*\* $P < 0.01$ , \*\*\* $P <$   
 173  $0.001$ ; red asterisks indicate significantly lower detection efficiency of demography- or  
 174 geography-aware approaches compared to random sampling). Note that sampling  
 175 simulations were not performed for RplD G70D in datasets 1 and 4 or for *penA* XXXIV  
 176 in dataset 3 as prevalence of the variants in these datasets was  $>10\%$ . n.s., not significant

177 at  $\alpha = 0.05$ ; M, men; W, women; MSM, men who have sex with men; MSW, men who  
178 have sex with women; WSM; women who have sex with men.  
179

180 Isolates from patients with recent overseas sex were associated with significantly  
181 longer terminal branches compared to patients that had only engaged in sex locally (**Fig.**  
182 **S1**), in support of the hypothesis that international travel may be associated with the  
183 importation of novel or divergent strains, or, more generally, that isolates from travelers  
184 may be more likely to be associated with under-sampled lineages. Preferentially sampling  
185 from patients with recent overseas sex significantly improved detection efficiency of the  
186 RplD G70D mutation and the *penA* XXXIV allele, as these were at marginally higher  
187 prevalence in isolates from patients with recent overseas sex compared to those from  
188 patients who had only engaged in sex locally (3.03% overseas vs. 0.98% local and 2.02%  
189 overseas vs. 1.67% local, respectively,  $P = 0.090$  and  $0.683$ , respectively, by Fisher's  
190 exact test for both variants). In contrast, the 23S C2611T mutation was exclusively  
191 present in isolates from patients who had engaged in sex locally (**Tables S1** and **S4**).  
192 Similarly, while the 23S C2611T mutation was marginally enriched in isolates from  
193 patients who had engaged in recent sex work compared to patients who had not (2.33%  
194 in sex workers vs. 1.31% in non-sex workers,  $P = 0.327$  by Fisher's exact test), and thus  
195 preferentially sampling from sex workers significantly improved detection efficiency of this  
196 variant compared to sampling from the full patient population, detection efficiencies for  
197 the RplD G70D mutation and the *penA* XXXIV allele were not significantly improved by  
198 preferentially sampling from sex workers (**Tables S1** and **S4**).

199 Together, these results suggest that while targeted sampling based on patient  
200 characteristics may increase detection efficiency of some novel variants, it is difficult to

201 predict which groups to target for all potential novel variants.

202

203 **Targeted sampling based on genetic diversity.**

204 To assess whether preferential sampling of lineages that are divergent from those that  
205 have been previously sampled may increase detection efficiency of genetic resistance  
206 variants over random sampling, we simulated phylogeny-aware sampling using two  
207 methods: 1) maximization of the phylogenetic distance covered with each isolate sampled  
208 (distance maximization) and 2) even sampling across phylogenetic lineages (clonal  
209 group).

210 While the distance maximization approach increased detection efficiency  
211 compared to random sampling for some variants, there were numerous instances in  
212 which this approach, which led to preferential sampling of isolates associated with long  
213 branches, substantially decreased detection efficiency (**Fig. 2, Table S5**).

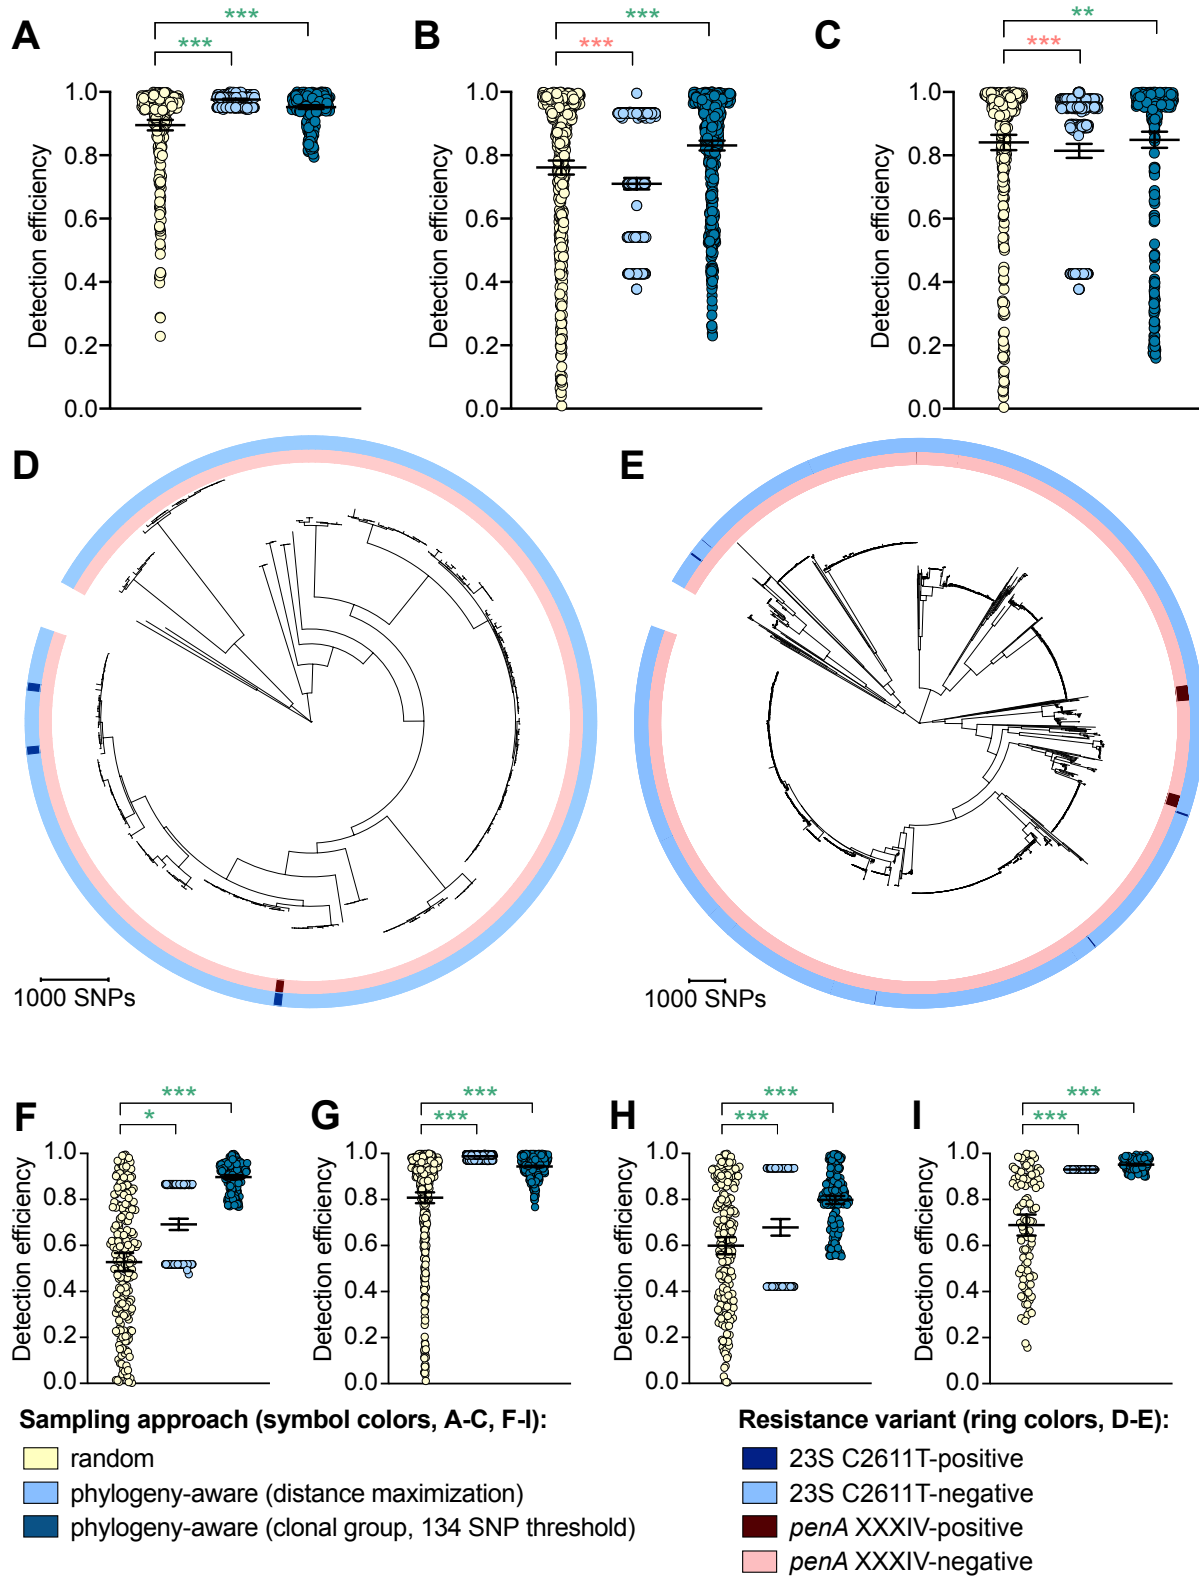

214

215 **Figure 2. The impact of phylogeny-aware sampling on the detection efficiency of**  
 216 **genetic resistance and diagnostic escape variants.** Scatter dot plots showing the

217 detection efficiency (with lines indicating the mean and 95% confidence intervals from  
218 100 simulations) for resistance variants RplD G70D (**A**), 23S rRNA C2611T (**B**), and *penA*  
219 XXXIV (**C**) in datasets 1-5. Note that sampling simulations were not performed for RplD  
220 G70D in datasets 1 and 4 or for *penA* XXXIV in dataset 3 as prevalence of the variants in  
221 these datasets was >10%. Maximum-likelihood phylogenies produced from  
222 pseudogenome alignments (with predicted regions of recombination removed) of isolates  
223 from dataset 4 (**D**) and dataset 2 (**E**). Presence or absence of the 23S rRNA C2611T  
224 mutation (in at least 2/4 alleles) and the mosaic *penA* XXXIV allele is indicated by colored  
225 rings. Scatter dot plots showing the detection efficiency (with lines indicating the mean  
226 and 95% confidence intervals from 100 simulations) for diagnostic-associated variants  
227 16S rRNA C1209A (**F**), *N. meningitidis*-like *porA* (**G**), *cppB* deletion (**H**), and DR-9A  
228 G168A (**I**) in all datasets in which the variant was present. Dot colors in **A-C** and **F-I**  
229 indicate the sampling approach, and asterisks indicate a significant difference ( $P < 0.05$   
230 by Mann-Whitney U test) in detection efficiency between the phylogeny-aware approach  
231 compared to random sampling (\* $P < 0.05$ , \*\* $P < 0.01$ , \*\*\* $P < 0.001$ ; red asterisks indicate  
232 significantly lower detection efficiency of the phylogeny-aware approach compared to  
233 random sampling, and green asterisks indicate significantly higher detection efficiency of  
234 the phylogeny-aware approach compared to random sampling). n.s., not significant at  $\alpha$   
235 = 0.05.

236  
237         The clonal group sampling approach prevents repeated sampling of very closely  
238 related isolates until all unique phylogenetic clusters have been sampled. Thus, for both  
239 rare variants that are clonally distributed and rare variants that are more randomly  
240 dispersed throughout the phylogeny (*e.g.*, *penA* XXXIV and 23S rRNA C2611T mutations,  
241 respectively, **Table 2**), this approach increases detection efficiency in cases where 1)  
242 there is substantial clonality among isolates and 2) a substantial proportion of variant-  
243 positive isolates do not occur in clonal lineages dominated by variant-negative isolates  
244 (**Fig. 2E**). In such datasets, effectively collapsing large variant-negative lineages into a  
245 single representative increases the effective prevalence of the variants and thus the  
246 detection efficiency of the clonal group approach compared to random sampling. The  
247 clonal group sampling approach significantly decreased detection efficiency in only one  
248 instance (*i.e.*, the 23S rRNA C2611T variant in dataset 4, **Table S5**), where all isolates

249 with the variant appeared in large clonal lineages of predominately variant-negative  
250 isolates (**Fig. 2D**).

251 In cases where the clonal group sampling approach did not perform better than  
252 random sampling, adjusting the threshold for clonal grouping and/or a marginal increase  
253 in the prevalence of variant-positive isolates could elevate the relative performance of this  
254 targeted approach. We chose 134 SNPs as an example threshold for clonal grouping, as  
255 it represents the lower 95% confidence interval of the mean of SNP distances between  
256 each CFX-R resistant and the closest susceptible isolate in datasets 1-5 (see Methods).  
257 In the case of the 23S rRNA C2611T variant in dataset 4, the average prevalence of the  
258 variant across clonal groups (*i.e.*, the total number of variant-positive isolates, counting  
259 each variant-positive isolate as  $[1 / [1 + \text{the total number of additional isolates that are} \leq$   
260  $134 \text{ SNPs of the isolate}]$ ], divided by the number of clonal groups) is 0.005, lower than  
261 the actual prevalence of 0.012. However, if the threshold for clonal grouping was lower in  
262 this instance (*e.g.*, 50 SNPs), the effective prevalence of the variants would be 0.020,  
263 greater than the actual prevalence of 0.012. Similarly, using the 134 SNP threshold, if  
264 one additional isolate that was > 134 SNPs from any other isolates in this dataset had the  
265 23S rRNA C2611T mutation, the average prevalence of the variant across clonal groups  
266 would be 0.036, greater than the actual prevalence of 0.016, and thus the clonal group  
267 approach would outperform random sampling.

268 To further assess the performance of phylogeny-aware sampling in the context of  
269 rare genetic variants that may have emerged in response to diagnostic pressure, we  
270 simulated random and phylogeny-aware sampling to assess detection efficiency of an  
271 additional set of variants. Specifically, we assessed a panel of *N. gonorrhoeae* diagnostic

272 escape variants: the 16S rRNA C1209A mutation, the *N. meningitidis*-like *porA*, and the  
 273 *cppB* deletion, all of which have been previously associated with diagnostic failure<sup>7-10</sup>  
 274 and were present in one or more of datasets 1-5 at low prevalence (**Table 3**). The G168A  
 275 mutation in the primer binding region of DR-9A, the target of the COBAS 4800 CT/NG  
 276 (Roche) diagnostic, has not previously been documented but was present in 0.1% of  
 277 strains from dataset 2. All of the diagnostic-associated variants assessed appeared in  
 278 divergent backgrounds and were thus detected more efficiently by phylogeny-aware  
 279 sampling compared to random sampling (**Fig. 2F-I, Table S6**). Like the results from the  
 280 simulations based on resistance variants, the distance maximization approach maximized  
 281 detection efficiency for some of the diagnostic-associated variants, but superiority of this  
 282 approach to random sampling was not consistent across all variants. However, the clonal  
 283 group approach performed significantly better than random sampling for all diagnostic-  
 284 associated variants across all datasets.

285  
 286

**Table 3.** Summary of the potential diagnostic escape variants assessed.

| Variant                                  | Diagnostic assay          | Documented association with diagnostic failure | Prevalence in dataset |       |       |    |       |
|------------------------------------------|---------------------------|------------------------------------------------|-----------------------|-------|-------|----|-------|
|                                          |                           |                                                | 1                     | 2     | 3     | 4  | 5     |
| 16S rRNA C1209A (4 alleles)              | Aptima GC Combo           | Yes <sup>7</sup>                               | 0.11%                 | 0.09% | 0%    | 0% | 0%    |
| <i>N. meningitidis</i> -like <i>porA</i> | In-house <sup>39,40</sup> | Yes <sup>8,9</sup>                             | 0.11%                 | 0.05% | 0%    | 0% | 0%    |
| <i>cppB</i> deletion                     | In-house <sup>41,42</sup> | Yes <sup>10</sup>                              | 1.12%                 | 0.05% | 0.47% | 0% | 7.29% |
| DR-9A G168A                              | Roche COBAS 4800 CT/NG    | No                                             | 0%                    | 0.09% | 0%    | 0% | 0%    |

287  
 288

289 The relative performance of the clonal group sampling approach compared to  
 290 random sampling was generally consistent across multiple thresholds based on



291 pseudogenomes (*i.e.*,  $\leq 134$  SNPs,  $\leq 422$  SNPs, and fastBAPS groups); relative  
292 performance of clonal group sampling using MLSTs, however, was less consistent and  
293 was significantly worse than random sampling for several variants (**Fig. S2, Tables S5-**  
294 **S6**). Together, these results suggest that preferentially sampling isolates that, based on  
295 whole genome sequencing (WGS), are phylogenetically divergent from those that have  
296 previously been sampled may increase detection efficiency of novel resistance variants.

297

### 298 **Targeted sampling based on genetic markers.**

299 Multiple drug resistance is more common in pathogenic bacteria than one would expect  
300 from the product of frequencies of resistance to individual drugs<sup>43,44</sup>. This suggests that  
301 novel resistance mechanisms might be more likely to arise and spread in bacterial strains  
302 that are already resistant to other drugs, a phenomenon that has been documented in *N.*  
303 *gonorrhoeae*<sup>45</sup>. It may therefore be fruitful to look for novel resistance variants for one  
304 drug in genetic backgrounds that are resistant to other drugs. It may be similarly effective  
305 to sample preferentially isolates with genetic markers that have been associated with a  
306 range of resistance mechanisms (*e.g.*, through epistatic interactions with other genetic  
307 variants) within and/or across different antibiotics when screening for a novel resistance  
308 variant. For example, as ciprofloxacin was the recommended first-line therapy for  
309 uncomplicated gonorrhea through 2005 in the United Kingdom<sup>46</sup>, 2007 in the United  
310 States<sup>47</sup>, and more recent years in other countries<sup>48-50</sup>, we investigated whether  
311 resistance to ESCs is significantly more likely to occur in the background of genotypic  
312 ciprofloxacin resistance (*i.e.*, in strains with the GyrA S91F mutation). Similarly, as  
313 mutations at positions 120 and/or 121 in PorB, the major outer membrane protein in



314 gonococci, have been associated with resistance to a range of drugs from multiple  
315 classes<sup>51</sup>, we investigated whether resistance to ESCs is significantly more likely to occur  
316 in strains with PorB 120 and/or 121 mutations. Isolates with CRO-RS and CFX-R were  
317 significantly more likely to have the GyrA S91F mutation and the PorB G120 and/or A121  
318 mutations than the wild-type GyrA S91 or wild-type PorB G120/A121 ( $P < 0.001$ , Fisher's  
319 exact test, **Fig. 3A-B**). Further, both GyrA S91F and PorB G120 and/or A121 mutations  
320 occurred across a range of ESC resistance locus haplotypes (**Fig. 3C-D**). For all datasets  
321 with CRO-RS or CFX-R isolates, detection efficiency of both variants was significantly  
322 increased by only sampling isolates with the GyrA S91F mutation or the PorB G120 and/or  
323 A121 mutations (**Fig. 3E-F, Table S7**). Together, these results suggest that preferential  
324 sampling of isolates with certain genetic markers, including markers of resistance to  
325 previous first-line antibiotics, may increase the detection efficiency of novel resistance  
326 variants.

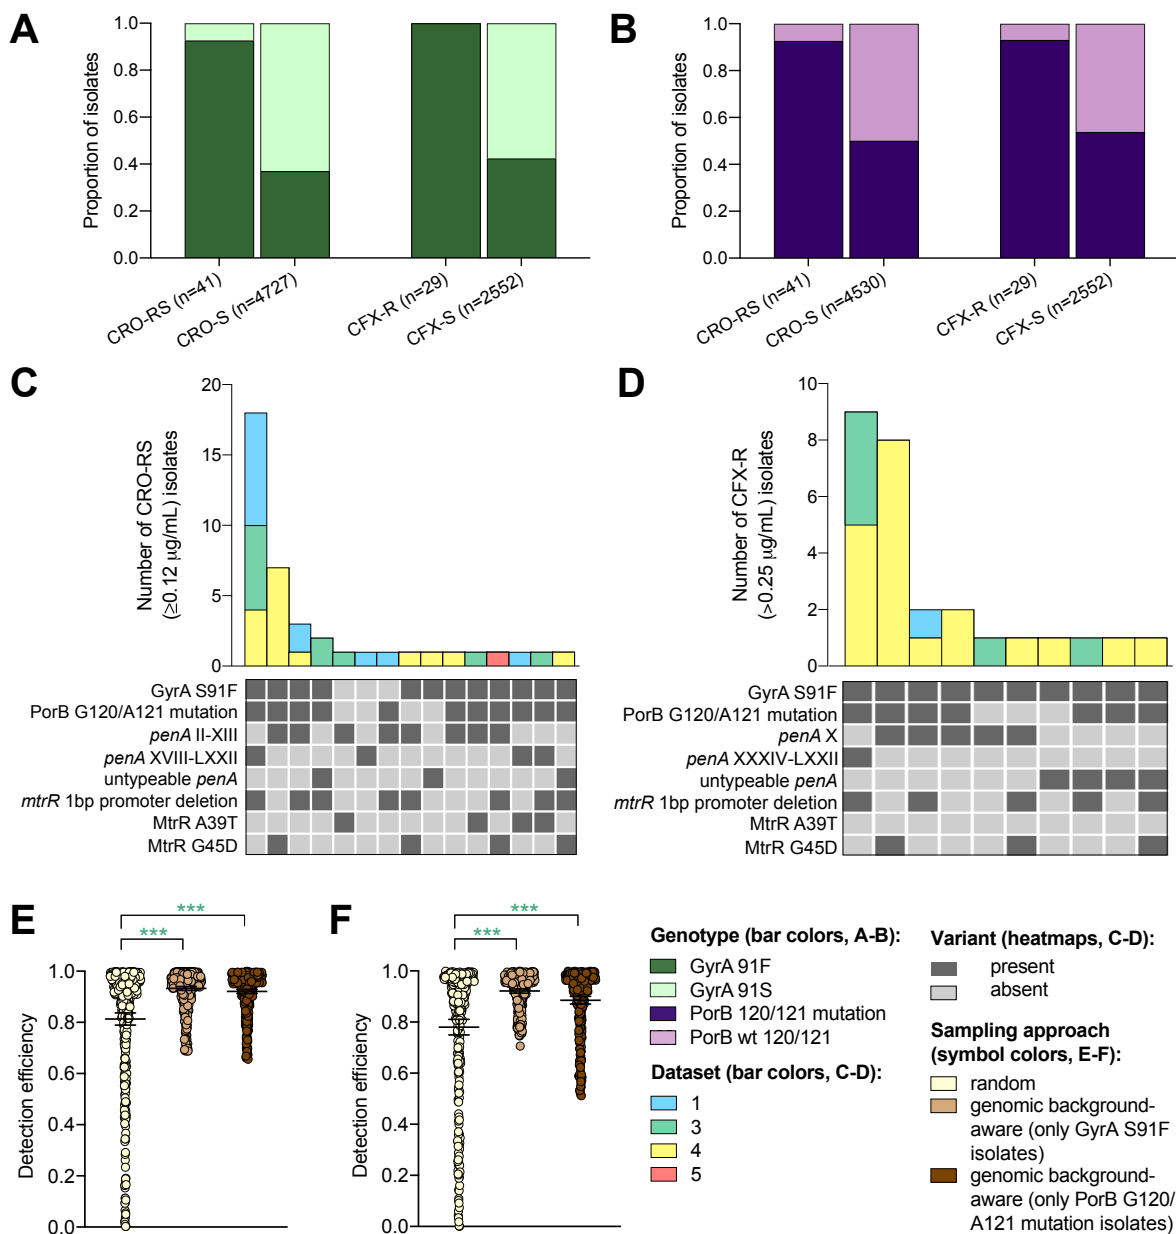

327

328 **Figure 3. The impact of genomic background-aware sampling on the detection**  
 329 **efficiency of phenotypic resistance variants.** Bar charts showing the proportions of  
 330 ceftriaxone reduced susceptibility (CRO-RS) isolates, ceftriaxone susceptible (CRO-S)  
 331 isolates, cefixime resistant (CFX-R) isolates, and cefixime susceptible (CFX-S) isolates  
 332 with GyrA S91F and GyrA S91 wild-type alleles (A) and with PorB G120 and/or A121  
 333 mutations and PorB G120 and A121 wild-type alleles (B) across datasets 1-5. Bar charts  
 334 showing the number of (C) CRO-RS and (D) CFX-R isolates with each haplotype, along  
 335 with heatmaps showing the presence or absence of the GyrA S19F mutation, the PorB  
 336 G120 and/or A121 mutations, and other alleles at loci previously associated with  
 337 extended spectrum cephalosporin resistance. Bar colors in (C) and (D) indicate the  
 338 dataset from which the isolates were derived. Scatter dot plots showing the detection  
 339 efficiency (with lines indicating the mean and 95% confidence intervals from 100

340 simulations) for CRO-RS (**E**) and CFX-R (**F**) in all datasets in which the variant was  
341 present. Dot colors in **E-F** indicate the sampling approach, and asterisks indicate a  
342 significant difference ( $P < 0.05$  by Mann-Whitney U test) in detection efficiency between  
343 the phylogeny-aware approach compared to random sampling ( $*P < 0.05$ ,  $**P < 0.01$ ,  
344  $***P < 0.001$ ; green asterisks indicate significantly higher detection efficiency of the  
345 genomic background-aware approach compared to random sampling).  
346

## 347 **Discussion**

348         With sequencing becoming more integral to routine pathogen surveillance and  
349 diagnostics, it is important to ensure that models mapping genotypic information to  
350 expected pathogen phenotype and/or clinical outcome are comprehensive and current<sup>52</sup>.  
351 In the case of genotype-based diagnostics, sustained phenotypic surveillance is crucial  
352 for identifying resistance variants that have recently emerged and/or increased in  
353 prevalence from previously undetected levels. While effective incorporation of patient  
354 metadata into surveillance strategies may be challenging, availability and incorporation  
355 of information on pathogen characteristics (e.g., pathogen genomic data) into surveillance  
356 programs may ultimately decrease the cost of surveillance to maintain the sensitivity of  
357 these diagnostic tools.

358         Collection of patient metadata, including demographic and geographic information,  
359 is crucial to understanding the epidemiology of drug resistance. However, it may be  
360 difficult to obtain data on the relevant patient features, and the predictive power of such  
361 features may rapidly decay because of patient mobility and interactions<sup>53</sup>. While  
362 availability of patient metadata varied across the datasets assessed, our results suggest  
363 that while incorporation of patient metadata into sampling strategies may increase  
364 detection efficiency for some novel resistance variants, it may be difficult to generalize for  
365 all potential novel resistance variants. It is possible that targeted sampling based on

366 patient characteristics may be more reliable in the context of pathogens, antibiotic, and/or  
367 patient characteristics not assessed here.

368       Incorporation of WGS into routine pathogen surveillance by public health agencies  
369 <sup>54,55</sup> may facilitate use of genomic information in phenotypic sampling strategies,  
370 particularly with emerging metagenomic approaches that do not require bacterial culture  
371 <sup>56</sup>. Our results show that phylogeny-aware sampling, particularly the clonal group  
372 approach, which reduces the amount of repeated sampling of closely related isolates,  
373 significantly improved detection efficiency over random sampling for multiple resistance  
374 and diagnostic-associated variants. Further, identification of and preferential sampling of  
375 isolates with genetic markers that are consistently predictive of resistance across a range  
376 of mechanisms, including those associated with resistance to other drugs, may  
377 supplement phylogeny-aware sampling to further optimize detection efficiency of novel  
378 variants. However, the utility of sampling based on genetic markers of other resistance  
379 mechanisms will likely vary substantially across different drugs and be influenced by  
380 future treatment guidelines.

381       While the clonal group sampling approach increased detection efficiency for the  
382 resistance and diagnostic escape variants assessed here, it may be difficult to determine  
383 the most effective and reliable metric or threshold for clonal grouping, especially as this  
384 is likely to vary across different clinical populations, antibiotics, and bacterial species.  
385 Detection efficiency was generally consistent across the two SNP thresholds and  
386 fastBAPS groupings based on WGS. However, performance of the clonal group approach  
387 using MLSTs was inconsistent and, in some instances, worse than random sampling,  
388 likely due to the shortcomings of MLST compared to WGS-based approaches in

389 distinguishing between AMR variant-positive clades and more distantly-related variant-  
390 negative clades in species such as *N. gonorrhoeae*<sup>34</sup>. This suggests that this approach  
391 is sensitive to similarity thresholds and that a low SNP threshold based on WGS  
392 assemblies may be the most appropriate approach, particularly in a population where  
393 there is expected to be substantial clonality among isolates and thus, even with a low  
394 threshold, detection efficiency will be improved by the clonal group approach. More  
395 broadly, surveillance incorporating WGS rather than MLST loci alone may further promote  
396 NAAT sustainability by enabling screening for variants with previously undetected  
397 mutations in target loci, such as the *N. gonorrhoeae* DR-9A G168A variants, that may be  
398 associated with diagnostic escape.

399 We have assessed these targeted sampling approaches in detection of multiple  
400 resistance variants across a range of populations, but these represent only a fraction of  
401 resistance mechanisms in a single species. These findings may extend to other antibiotics  
402 and bacterial species. For example, given the high degree of clonality among *M.*  
403 *tuberculosis* isolates and the significant variation in prevalence of drug resistance and  
404 resistance-conferring genotypes across clonal groups<sup>57,58</sup>, the clonal group sampling  
405 approach may similarly improve detection efficiency of novel resistance variants in *M.*  
406 *tuberculosis*. For species in which drug resistance is primarily acquired through gene  
407 acquisition, it is unclear if phylogeny-aware sampling based on the core genome will  
408 improve detection efficiency of novel variants. K-mer distances<sup>59,60</sup> may provide a more  
409 practical alternative generalizable to more resistance mechanisms associated with gene  
410 acquisition. Further, the requirement of confirmatory phenotyping to identify novel  
411 resistance may not extend to pathogens that are expected to be associated with reliably-

412 identifiable treatment failures, as for these pathogens, identification of treatment failure  
413 likely represents the most efficient method of novel resistance variant detection <sup>61</sup>.  
414 However, for other pathogens, such as *N. gonorrhoeae* <sup>62</sup>, treatment failures may go  
415 undetected for reasons including partial abatement of symptoms or long treatment  
416 regimens. Ultimately, as genotype-based diagnostics for antibiotic resistance become  
417 available for more species, it will be important to assess the efficiencies of these  
418 approaches across pathogens with different clinical, epidemiological, and evolutionary  
419 paradigms.

420         Since we lack the datasets to assess targeted sampling of variants from the time  
421 they first emerged in a population, any associations we observed between the variants  
422 and patient or pathogen features do not necessarily reflect those around the time of  
423 emergence. Thus, more longitudinal epidemiological and genomic studies, particularly  
424 after the implementation of genotype-based diagnostics, are necessary to better  
425 characterize patterns of novel resistance emergence and inform targeted surveillance  
426 approaches.

427         The phylogeny-aware sampling approaches presented here are based on the  
428 assumption that genomic data will be available for the pool of potential isolates from  
429 incident cases that may undergo confirmatory phenotyping. However, using information  
430 on isolate features to increase surveillance efficiency may be feasible even in the absence  
431 of mass prospective sequencing. For example, under the general assumption that novel  
432 resistance variants are more likely to appear in underrepresented lineages, phylogeny-  
433 aware surveillance could be paired with a diagnostic approach such as genomic neighbor  
434 typing <sup>56</sup>, where any isolates with either susceptible or low confidence calls that appear

435 to be divergent from the genomes in the reference database would be prioritized for  
436 confirmatory phenotyping. Similarly, a diagnostic that predicts AMR phenotypes through  
437 a combination of transcriptomic and genomic typing<sup>63</sup> may facilitate targeted surveillance  
438 by identifying isolates with ambiguous predictions (*e.g.*, isolates with transcriptional  
439 signatures of resistance that lack known genomic markers of resistance) that could be  
440 prioritized for confirmatory phenotyping.

441 Advances in diagnostics, extensive sequencing of clinical isolates, and large  
442 collections of clinical and pathogen data together provide new opportunities for integrating  
443 data streams and optimizing surveillance efforts. As marker-based point-of-care AMR  
444 diagnostics are developed and implemented, optimization of surveillance systems will  
445 require assessments like those modeled here of species-, drug-, and population-specific  
446 factors that may affect the emergence and distribution of diagnostic escape resistance  
447 variants, as well as how the diagnostic itself may complement surveillance efforts.

448

## 449 **Methods:**

### 450 **Dataset preparation and phylogenetic reconstruction**

451 See **Table 1** for details of the *N. gonorrhoeae* datasets and **Tables 2** and **3** for the  
452 variants assessed. Raw sequencing data were downloaded from the NCBI Sequence  
453 Read Archive. Genomes were assembled using SPAdes v3.13<sup>64</sup> with default  
454 parameters and the careful option to minimize the number of mismatches. Assembly  
455 quality was assessed using QUAST v4.3<sup>65</sup>, and contigs <500 bp in length and/or with  
456 <10x average coverage were removed. Isolate reference-based pseudogenomes were  
457 constructed by mapping raw reads to the NCCP11945 reference genome (RefSeq

458 accession number NC\_011035.1) using BWA-MEM v7.12 <sup>66</sup>, the Picard toolkit v2.8  
459 (<http://broadinstitute.github.io/picard>) to identify duplicate reads, and Pilon v1.22 <sup>67</sup> to  
460 determine the base call for each site, with a minimum depth of 10 and a minimum base  
461 quality of 20.

462 Loci in **Tables 2** and **3** were extracted from the genome assemblies using blastn  
463 <sup>68</sup> followed by MUSCLE alignment using default parameters <sup>69</sup> to assess the presence  
464 or absence of the resistance variants. Presence or absence of mutations in the multi-  
465 copy 16S and 23S rRNA genes and the repetitive DR-9A and DR-9B regions <sup>70</sup> was  
466 assessed using BWA-MEM, the Picard toolkit, and Pilon, as above, to map raw reads  
467 to a single 16S rRNA allele, a single 23S rRNA allele, a single DR-9A region, and a  
468 single DR-9B region from the NCCP11945 reference isolate and determine the  
469 mapping quality-weighted percentage of each nucleotide at the site of interest. Isolate  
470 metadata and resistance variant profiles are given in **Table S1**.

471 Gubbins v2.3.4 <sup>71</sup> was used with default parameters to identify and mask  
472 recombinant regions from the pseudogenomes and build maximum likelihood  
473 phylogenies from the non-recombinant pseudogenome alignments for each dataset  
474 through RAxML v8.2.12 <sup>72</sup>. Pairwise phylogenetic distances were calculated after removal  
475 of predicted recombinant regions using the ape package in R. Phylogenetic distributions  
476 of genetic resistance variants were assessed by estimating the phylogenetic D statistic <sup>73</sup>  
477 using the caper package in R. Bayesian analysis of population structure was performed  
478 on the pseudogenome alignments for each dataset using fastBAPS <sup>74</sup>. Multilocus  
479 sequence types (MLSTs) were assigned using the PubMLST database  
480 (<https://pubmlst.org/neisseria/>).



481

## 482 **Sampling approaches**

483 For each sampling approach/dataset/variant combination, 100 simulations were carried  
484 out with isolate sampling continuing until variant detection. We defined 'detection  
485 efficiency' as 1 minus the fraction of isolates sampled prior to variant detection (excluding  
486 any samples for which the presence or absence of the variant could not be determined).  
487 Because the purpose of this study was to compare the rare variant detection efficiency  
488 between random sampling and targeted sampling approaches, we did not evaluate RplD  
489 G70D in datasets 1 and 4 or for the *penA* XXXIV allele in dataset 3, as the prevalence of  
490 these variants in these datasets was > 10%.

491 In demography-aware sampling (datasets 1 and 2), the first isolate was selected  
492 at random, and each successive isolate was randomly selected from alternating  
493 demographic groups (men vs. women and men who have sex with men [MSM] vs. men  
494 who have sex with women [MSW] or women who have sex with men [WSM]). For  
495 anatomical site (niche)-aware sampling (datasets 1 and 2), the first isolate was selected  
496 at random, and each successive isolate was randomly selected from alternating  
497 anatomical sites of isolate collection (*i.e.*, cervix, urethra, rectum, and pharynx). For  
498 geography-aware sampling (datasets 3 and 4), the first isolate was selected at random,  
499 and each successive isolate was randomly selected from alternating geographic regions  
500 (countries or prefectures). For geography- and distance-aware sampling (datasets 3 and  
501 4), the first isolate was selected at random, and each successive isolate was selected  
502 randomly from the region (country or prefecture) with the largest product of geographic  
503 distances from previously sampled regions, only re-sampling from a given region after all

504 regions had been sampled in that round. For travel history- and sex work-aware sampling  
505 (dataset 2), isolates were selected at random either limiting the pool to isolates from  
506 patients who had recently engaged in overseas sex or sex work, respectively <sup>33</sup>.

507 For phylogeny-aware sampling (datasets 1-5), the first isolate was selected at  
508 random, and each successive isolate was either selected to maximize the product of  
509 phylogenetic distances from each of the previously sampled isolates (“distance  
510 maximization”) or selected randomly with the exception of ensuring even sampling across  
511 phylogenetic groups (“clonal group”; *i.e.*, isolates  $\leq N$  SNPs from a previously sampled  
512 isolate that were excluded from future sampling until all “clonal groups” had been  
513 sampled). SNP cutoffs tested for the clonal group approach included 1) 134 SNPs, the  
514 lower 95% confidence interval of the mean SNP distance across datasets 1-5 between  
515 each isolate with phenotypic cefixime resistance (CFX-R), azithromycin resistance (AZM-  
516 R), and/or ceftriaxone reduced susceptibility (CRO-RS,  $>0.25 \mu\text{g/mL}$ ,  $>1 \mu\text{g/mL}$ , and  
517  $\geq 0.12 \mu\text{g/mL}$ , respectively) and the closest susceptible isolate, and 2) 422 SNPs, the  
518 lower 95% confidence interval of the mean SNP distance across datasets 1-5 between  
519 each isolate with the RplD G70D mutation, the 23S rRNA C2611T mutation, and/or the  
520 *penA* XXXIV allele and the closest isolate without the resistance variant. The clonal group  
521 sampling approach was further tested by alternating sampling across fastBAPS and  
522 MLST groups.

523 For genomic background-aware sampling, isolates were selected at random either  
524 limiting the pool to isolates with genotypic ciprofloxacin resistance (*i.e.*, the GyrA S91F  
525 mutation) or to isolates with a mutation at PorB G120 and/or PorB A121, which have been  
526 associated with a range of resistance pathways in multiple classes of antibiotics <sup>51</sup>.

527 Genomic background-aware sampling was assessed in detection of CRO-RS (datasets  
528 1 and 3-5; dataset 2 had no CRO-RS isolates) and CFX-R (datasets 1 and 3-4; datasets  
529 2 and 5 had no CFX-RS isolates).

530

## 531 **References:**

532

- 533 1 McAdams, D., Waldetoft, K. W., Tedijanto, C., Lipsitch, M. & Brown, S. P.  
534 Resistance diagnostics as a public health tool to combat antibiotic resistance: A  
535 model-based evaluation. *PLoS Biol* **17**, e3000250,  
536 doi:<https://doi.org/10.1371/journal.pbio.3000250> (2019).
- 537 2 Fingerhuth, S. M., Low, N., Bonhoeffer, S. & Althaus, C. L. Detection of antibiotic  
538 resistance is essential for gonorrhoea point-of-care testing: a mathematical  
539 modelling study. *BMC Med* **15**, 142, doi:10.1186/s12916-017-0881-x (2017).
- 540 3 Tuite, A. R. *et al.* Impact of Rapid Susceptibility Testing and Antibiotic Selection  
541 Strategy on the Emergence and Spread of Antibiotic Resistance in Gonorrhoea. *J*  
542 *Infect Dis* **216**, 1141-1149, doi:10.1093/infdis/jix450 (2017).
- 543 4 Andre, E. *et al.* Novel rapid PCR for the detection of Ile491Phe rpoB mutation of  
544 Mycobacterium tuberculosis, a rifampicin-resistance-conferring mutation  
545 undetected by commercial assays. *Clin Microbiol Infect* **23**, 267 e265-267 e267,  
546 doi:10.1016/j.cmi.2016.12.009 (2017).
- 547 5 Berhane, A. *et al.* Major Threat to Malaria Control Programs by Plasmodium  
548 falciparum Lacking Histidine-Rich Protein 2, Eritrea. *Emerg Infect Dis* **24**, 462-  
549 470, doi:10.3201/eid2403.171723 (2018).
- 550 6 Herrmann, B. *et al.* Emergence and spread of Chlamydia trachomatis variant,  
551 Sweden. *Emerg Infect Dis* **14**, 1462-1465, doi:10.3201/eid1409.080153 (2008).
- 552 7 Guglielmino, C. J. D., Appleton, S., Vohra, R. & Jennison, A. V. Identification of  
553 an unusual 16S rRNA mutation in Neisseria gonorrhoeae. *J Clin Microbiol*,  
554 doi:10.1128/JCM.01337-19 (2019).
- 555 8 Whiley, D. M. *et al.* False-negative results using Neisseria gonorrhoeae porA  
556 pseudogene PCR - a clinical gonococcal isolate with an N. meningitidis porA  
557 sequence, Australia, March 2011. *Euro Surveill* **16** (2011).
- 558 9 Golparian, D., Johansson, E. & Unemo, M. Clinical Neisseria gonorrhoeae isolate  
559 with a N. meningitidis porA gene and no prolyliminopeptidase activity, Sweden,  
560 2011: danger of false-negative genetic and culture diagnostic results. *Euro*  
561 *Surveill* **17** (2012).
- 562 10 Bruisten, S. M. *et al.* Multicenter validation of the cppB gene as a PCR target for  
563 detection of Neisseria gonorrhoeae. *J Clin Microbiol* **42**, 4332-4334,  
564 doi:10.1128/JCM.42.9.4332-4334.2004 (2004).

- 565 11 Lee, G. H., Pang, S. & Coombs, G. W. Misidentification of *Staphylococcus*  
566 *aureus* by the Cepheid Xpert MRSA/SA BC Assay Due to Deletions in the *spa*  
567 Gene. *Journal of clinical microbiology* **56**, doi:10.1128/JCM.00530-18 (2018).
- 568 12 Marks, M. *et al.* Diagnostics for Yaws Eradication: Insights From Direct Next-  
569 Generation Sequencing of Cutaneous Strains of *Treponema pallidum*. *Clin Infect*  
570 *Dis* **66**, 818-824, doi:10.1093/cid/cix892 (2018).
- 571 13 Smid, J. H., Althaus, C. L., Low, N., Unemo, M. & Herrmann, B. Rise and fall of  
572 the new variant of *Chlamydia trachomatis* in Sweden: mathematical modelling  
573 study. *Sex Transm Infect*, doi:10.1136/sextrans-2019-054057 (2019).
- 574 14 Hicks, A. L., Kissler, S. M., Lipsitch, M. & Grad, Y. H. Surveillance to maintain the  
575 sensitivity of genotype-based antibiotic resistance diagnostics. *PLoS Biol* **17**,  
576 e3000547, doi:10.1371/journal.pbio.3000547 (2019).
- 577 15 Rempel, O. R. & Laupland, K. B. Surveillance for antimicrobial resistant  
578 organisms: potential sources and magnitude of bias. *Epidemiol Infect* **137**, 1665-  
579 1673, doi:10.1017/S0950268809990100 (2009).
- 580 16 Unemo, M. *et al.* World Health Organization Global Gonococcal Antimicrobial  
581 Surveillance Program (WHO GASP): review of new data and evidence to inform  
582 international collaborative actions and research efforts. *Sex Health*,  
583 doi:10.1071/SH19023 (2019).
- 584 17 Hutinel, M. *et al.* Population-level surveillance of antibiotic resistance in  
585 *Escherichia coli* through sewage analysis. *Euro Surveill* **24**, doi:10.2807/1560-  
586 7917.ES.2019.24.37.1800497 (2019).
- 587 18 Van Goethem, N. *et al.* Status and potential of bacterial genomics for public  
588 health practice: a scoping review. *Implement Sci* **14**, 79, doi:10.1186/s13012-  
589 019-0930-2 (2019).
- 590 19 Lewis, D. A. The role of core groups in the emergence and dissemination of  
591 antimicrobial-resistant *N gonorrhoeae*. *Sex Transm Infect* **89 Suppl 4**, iv47-51,  
592 doi:10.1136/sextrans-2013-051020 (2013).
- 593 20 Collignon, P., Beggs, J. J., Walsh, T. R., Gandra, S. & Laxminarayan, R.  
594 Anthropological and socioeconomic factors contributing to global antimicrobial  
595 resistance: a univariate and multivariable analysis. *Lancet Planet Health* **2**, e398-  
596 e405, doi:10.1016/S2542-5196(18)30186-4 (2018).
- 597 21 Frost, I., Van Boeckel, T. P., Pires, J., Craig, J. & Laxminarayan, R. Global  
598 Geographic Trends in Antimicrobial Resistance: The Role of International Travel.  
599 *J Travel Med*, doi:10.1093/jtm/taz036 (2019).
- 600 22 Hernando Rovirola, C. *et al.* Antimicrobial resistance in *Neisseria gonorrhoeae*  
601 isolates from foreign-born population in the European Gonococcal Antimicrobial  
602 Surveillance Programme. *Sex Transm Infect*, doi:10.1136/sextrans-2018-053912  
603 (2020).
- 604 23 Kirkcaldy, R. D., Weston, E., Segurado, A. C. & Hughes, G. Epidemiology of  
605 gonorrhoea: a global perspective. *Sex Health*, doi:10.1071/SH19061 (2019).
- 606 24 Perrin, L., Kaiser, L. & Yerly, S. Travel and the spread of HIV-1 genetic variants.  
607 *Lancet Infect Dis* **3**, 22-27 (2003).
- 608 25 Pham Thanh, D. *et al.* A novel ciprofloxacin-resistant subclade of H58  
609 *Salmonella Typhi* is associated with fluoroquinolone treatment failure. *Elife* **5**,  
610 e14003, doi:10.7554/eLife.14003 (2016).

- 611 26 Kingsley, R. A. *et al.* Epidemic multiple drug resistant Salmonella Typhimurium  
612 causing invasive disease in sub-Saharan Africa have a distinct genotype.  
613 *Genome Res* **19**, 2279-2287, doi:10.1101/gr.091017.109 (2009).
- 614 27 Mac Aogain, M., Rogers, T. R. & Crowley, B. Identification of emergent bla CMY-  
615 2 -carrying *Proteus mirabilis* lineages by whole-genome sequencing. *New*  
616 *Microbes New Infect* **9**, 58-62, doi:10.1016/j.nmni.2015.11.012 (2016).
- 617 28 Borrell, S. & Gagneux, S. Strain diversity, epistasis and the evolution of drug  
618 resistance in *Mycobacterium tuberculosis*. *Clin Microbiol Infect* **17**, 815-820,  
619 doi:10.1111/j.1469-0691.2011.03556.x (2011).
- 620 29 Gould, I. M. & MacKenzie, F. M. Antibiotic exposure as a risk factor for  
621 emergence of resistance: the influence of concentration. *J Appl Microbiol* **92**  
622 **Suppl**, 78S-84S (2002).
- 623 30 Hook, E. W., 3rd & Kirkcaldy, R. D. A Brief History of Evolving Diagnostics and  
624 Therapy for Gonorrhoea: Lessons Learned. *Clin Infect Dis* **67**, 1294-1299,  
625 doi:10.1093/cid/ciy271 (2018).
- 626 31 Yahara, K. *et al.* Genomic surveillance of *Neisseria gonorrhoeae* to investigate  
627 the distribution and evolution of antimicrobial-resistance determinants and  
628 lineages. *Microb Genom* **4**, doi:10.1099/mgen.0.000205 (2018).
- 629 32 Wiesner, P. J., Tronca, E., Bonin, P., Pedersen, A. H. & Holmes, K. K. Clinical  
630 spectrum of pharyngeal gonococcal infection. *N Engl J Med* **288**, 181-185,  
631 doi:10.1056/NEJM197301252880404 (1973).
- 632 33 Williamson, D. *et al.* Bridging of *Neisseria Gonorrhoeae* Across Diverse Sexual  
633 Networks in the HIV Pre-Exposure Prophylaxis (PrEP) Era: A Clinical and  
634 Molecular Epidemiological Study. *Nature Communications* **10**, 3988 (2019).
- 635 34 Harris, S. R. *et al.* Public health surveillance of multidrug-resistant clones of  
636 *Neisseria gonorrhoeae* in Europe: a genomic survey. *Lancet Infect Dis* **18**, 758-  
637 768, doi:10.1016/S1473-3099(18)30225-1 (2018).
- 638 35 Lee, R. S. *et al.* Genomic epidemiology and antimicrobial resistance of *Neisseria*  
639 *gonorrhoeae* in New Zealand. *J Antimicrob Chemother* **73**, 353-364,  
640 doi:10.1093/jac/dkx405 (2018).
- 641 36 Grad, Y. H. *et al.* Genomic Epidemiology of Gonococcal Resistance to Extended-  
642 Spectrum Cephalosporins, Macrolides, and Fluoroquinolones in the United  
643 States, 2000-2013. *J Infect Dis* **214**, 1579-1587, doi:10.1093/infdis/jiw420 (2016).
- 644 37 Ng, L. K., Martin, I., Liu, G. & Bryden, L. Mutation in 23S rRNA associated with  
645 macrolide resistance in *Neisseria gonorrhoeae*. *Antimicrob Agents Chemother*  
646 **46**, 3020-3025 (2002).
- 647 38 Grad, Y. H. *et al.* Genomic epidemiology of *Neisseria gonorrhoeae* with reduced  
648 susceptibility to cefixime in the USA: a retrospective observational study. *Lancet*  
649 *Infect Dis* **14**, 220-226, doi:10.1016/S1473-3099(13)70693-5 (2014).
- 650 39 Whiley, D. M. *et al.* A new confirmatory *Neisseria gonorrhoeae* real-time PCR  
651 assay targeting the *porA* pseudogene. *Eur J Clin Microbiol Infect Dis* **23**, 705-  
652 710, doi:10.1007/s10096-004-1170-0 (2004).
- 653 40 Whiley, D. M. *et al.* A real-time PCR assay for the detection of *Neisseria*  
654 *gonorrhoeae* in genital and extragenital specimens. *Diagn Microbiol Infect Dis* **52**,  
655 1-5, doi:10.1016/j.diagmicrobio.2004.12.011 (2005).



- 656 41 Diemert, D. J., Libman, M. D. & Lebel, P. Confirmation by 16S rRNA PCR of the  
657 COBAS AMPLICOR CT/NG test for diagnosis of *Neisseria gonorrhoeae* infection  
658 in a low-prevalence population. *J Clin Microbiol* **40**, 4056-4059,  
659 doi:10.1128/jcm.40.11.4056-4059.2002 (2002).
- 660 42 Van Dyck, E., Smet, H., Van Damme, L. & Laga, M. Evaluation of the Roche  
661 *Neisseria gonorrhoeae* 16S rRNA PCR for confirmation of AMPLICOR PCR-  
662 positive samples and comparison of its diagnostic performance according to  
663 storage conditions and preparation of endocervical specimens. *J Clin Microbiol*  
664 **39**, 2280-2282, doi:10.1128/JCM.39.6.2280-2282.2001 (2001).
- 665 43 Chang, H. H. *et al.* Origin and proliferation of multiple-drug resistance in bacterial  
666 pathogens. *Microbiol Mol Biol Rev* **79**, 101-116, doi:10.1128/MMBR.00039-14  
667 (2015).
- 668 44 Lehtinen, S., Blanquart, F., Lipsitch, M., Fraser, C. & with the Maela  
669 Pneumococcal, C. On the evolutionary ecology of multidrug resistance in  
670 bacteria. *PLoS Pathog* **15**, e1007763, doi:10.1371/journal.ppat.1007763 (2019).
- 671 45 Goldstein, E. *et al.* Factors related to increasing prevalence of resistance to  
672 ciprofloxacin and other antimicrobial drugs in *Neisseria gonorrhoeae*, United  
673 States. *Emerg Infect Dis* **18**, 1290-1297, doi:10.3201/eid1808.111202 (2012).
- 674 46 Whittles, L. K., White, P. J., Paul, J. & Didelot, X. Epidemiological Trends of  
675 Antibiotic Resistant Gonorrhoea in the United Kingdom. *Antibiotics (Basel)* **7**,  
676 doi:10.3390/antibiotics7030060 (2018).
- 677 47 Centers for Disease, C. & Prevention. Update to CDC's sexually transmitted  
678 diseases treatment guidelines, 2006: fluoroquinolones no longer recommended  
679 for treatment of gonococcal infections. *MMWR Morb Mortal Wkly Rep* **56**, 332-  
680 336 (2007).
- 681 48 Hemarajata, P., Yang, S., Soge, O. O., Humphries, R. M. & Klausner, J. D.  
682 Performance and Verification of a Real-Time PCR Assay Targeting the *gyrA*  
683 Gene for Prediction of Ciprofloxacin Resistance in *Neisseria gonorrhoeae*. *J Clin*  
684 *Microbiol* **54**, 805-808, doi:10.1128/JCM.03032-15 (2016).
- 685 49 Unemo, M. & Dillon, J. A. Mitigating the emergence and spread of multidrug- and  
686 extensively drug-resistant gonorrhoea: is there sufficient support in resource-poor  
687 settings in Africa? *Sex Transm Dis* **41**, 238-239,  
688 doi:10.1097/OLQ.000000000000117 (2014).
- 689 50 Bazzo, M. L. *et al.* First nationwide antimicrobial susceptibility surveillance for  
690 *Neisseria gonorrhoeae* in Brazil, 2015-16. *J Antimicrob Chemother* **73**, 1854-  
691 1861, doi:10.1093/jac/dky090 (2018).
- 692 51 Mortimer, T. D. & Grad, Y. H. Applications of genomics to slow the spread of  
693 multidrug-resistant *Neisseria gonorrhoeae*. *Ann N Y Acad Sci* **1435**, 93-109,  
694 doi:10.1111/nyas.13871 (2019).
- 695 52 Dona, V., Low, N., Golparian, D. & Unemo, M. Recent advances in the  
696 development and use of molecular tests to predict antimicrobial resistance in  
697 *Neisseria gonorrhoeae*. *Expert Rev Mol Diagn* **17**, 845-859,  
698 doi:10.1080/14737159.2017.1360137 (2017).
- 699 53 Goldstein, E., Pitzer, V. E., O'Hagan, J. J. & Lipsitch, M. Temporally Varying  
700 Relative Risks for Infectious Diseases: Implications for Infectious Disease

- 701 Control. *Epidemiology* **28**, 136-144, doi:10.1097/EDE.0000000000000571  
702 (2017).
- 703 54 European Centre for Disease Prevention and Control. ECDC strategic framework  
704 for the integration of molecular and genomic typing into European surveillance  
705 and multi-country outbreak investigations. (2019).
- 706 55 Brown, E., Dessai, U., McGarry, S. & Gerner-Smidt, P. Use of Whole-Genome  
707 Sequencing for Food Safety and Public Health in the United States. *Foodborne*  
708 *Pathog Dis* **16**, 441–450, doi:10.1089/fpd.2019.2662 (2019).
- 709 56 Břinda, K. *et al.* Rapid heuristic inference of antibiotic resistance and  
710 susceptibility by genomic neighbor typing. *bioRxiv*,  
711 doi:<http://dx.doi.org/10.1101/403204> (2019).
- 712 57 Merker, M. *et al.* Evolutionary history and global spread of the Mycobacterium  
713 tuberculosis Beijing lineage. *Nat Genet* **47**, 242-249, doi:10.1038/ng.3195 (2015).
- 714 58 Casali, N. *et al.* Evolution and transmission of drug-resistant tuberculosis in a  
715 Russian population. *Nat Genet* **46**, 279-286, doi:10.1038/ng.2878 (2014).
- 716 59 Ondov, B. D. *et al.* Mash: fast genome and metagenome distance estimation  
717 using MinHash. *Genome Biol* **17**, 132, doi:10.1186/s13059-016-0997-x (2016).
- 718 60 Lees, J. A. *et al.* Fast and flexible bacterial genomic epidemiology with  
719 PopPUNK. *Genome Res* **29**, 304-316, doi:10.1101/gr.241455.118 (2019).
- 720 61 Berenger, B. M. *et al.* Genetic Characterization and Enhanced Surveillance of  
721 Ceftriaxone-Resistant *Neisseria gonorrhoeae* Strain, Alberta, Canada, 2018.  
722 *Emerg Infect Dis* **25**, 1660-1667, doi:10.3201/eid2509.190407 (2019).
- 723 62 Eyre, D. W. *et al.* Detection in the United Kingdom of the *Neisseria gonorrhoeae*  
724 FC428 clone, with ceftriaxone resistance and intermediate resistance to  
725 azithromycin, October to December 2018. *Euro Surveill* **24**, doi:10.2807/1560-  
726 7917.ES.2019.24.10.1900147 (2019).
- 727 63 Bhattacharyya, R. P. *et al.* Simultaneous detection of genotype and phenotype  
728 enables rapid and accurate antibiotic susceptibility determination. *Nat Med* **25**,  
729 1858-1864, doi:10.1038/s41591-019-0650-9 (2019).
- 730 64 Bankevich, A. *et al.* SPAdes: a new genome assembly algorithm and its  
731 applications to single-cell sequencing. *J Comput Biol* **19**, 455-477,  
732 doi:10.1089/cmb.2012.0021 (2012).
- 733 65 Gurevich, A., Saveliev, V., Vyahhi, N. & Tesler, G. QUASt: quality assessment  
734 tool for genome assemblies. *Bioinformatics* **29**, 1072-1075,  
735 doi:10.1093/bioinformatics/btt086 (2013).
- 736 66 Li, H. Aligning sequence reads, clone sequences and assembly contigs with  
737 BWA-MEM. *arXiv e-prints*, doi:arXiv:1303.3997 (2013).
- 738 67 Walker, B. J. *et al.* Pilon: an integrated tool for comprehensive microbial variant  
739 detection and genome assembly improvement. *PLoS One* **9**, e112963,  
740 doi:10.1371/journal.pone.0112963 (2014).
- 741 68 Altschul, S. F., Gish, W., Miller, W., Myers, E. W. & Lipman, D. J. Basic local  
742 alignment search tool. *J Mol Biol* **215**, 403-410, doi:10.1016/S0022-  
743 2836(05)80360-2 (1990).
- 744 69 Edgar, R. C. MUSCLE: multiple sequence alignment with high accuracy and high  
745 throughput. *Nucleic Acids Res* **32**, 1792-1797, doi:10.1093/nar/gkh340 (2004).

- 746 70 Kawa, D., Lu, S.-D. & Dailey, P. Oligonucleotides, methods and kits for detecting  
747 Neisseria Gonorrhoeae. WO patent EP1697541B1 (2013).
- 748 71 Croucher, N. J. *et al.* Rapid phylogenetic analysis of large samples of  
749 recombinant bacterial whole genome sequences using Gubbins. *Nucleic Acids*  
750 *Res* **43**, e15, doi:10.1093/nar/gku1196 (2015).
- 751 72 Sommer, M. O. A., Munck, C., Toft-Kehler, R. V. & Andersson, D. I. Prediction of  
752 antibiotic resistance: time for a new preclinical paradigm? *Nat Rev Microbiol* **15**,  
753 689-696, doi:10.1038/nrmicro.2017.75 (2017).
- 754 73 Fritz, S. A. & Purvis, A. Selectivity in mammalian extinction risk and threat types:  
755 a new measure of phylogenetic signal strength in binary traits. *Conserv Biol* **24**,  
756 1042-1051, doi:10.1111/j.1523-1739.2010.01455.x (2010).
- 757 74 Tonkin-Hill, G., Lees, J. A., Bentley, S. D., Frost, S. D. W. & Corander, J. Fast  
758 hierarchical Bayesian analysis of population structure. *Nucleic Acids Res* **47**,  
759 5539-5549, doi:10.1093/nar/gkz361 (2019).
- 760
